# Supplementary material for: Sensitive recognition of cyanide through supramolecularly complexed new calix[4]arenes
Source: Royal Society of Chemistry journal article supplement (doi:10.1039/c4nj00065j), 2014-01-01
Supplement: c4nj00065j1.pdf [file c4nj00065j1.pdf]

ELECTRONIC SUPPLEMENTARY INFORMATION (ESI)

**A sensitive recognition of cyanide through supramolecularly  
complexed new calix[4]arenes**

H. M. Chawla,\* Richa Shukla and Preeti Goel

*Department of Chemistry, Indian Institute of Technology Delhi, Hauz Khas, New Delhi – 110016, India.*

\* Corresponding author. E-mail: [hmchawla@chemistry.iitd.ac.in](mailto:hmchawla@chemistry.iitd.ac.in) (HMC), Tel: +91-11-26591517, Fax:  
+91-11-26581102.

## Table of contents

| Content                                                                                              | Page no |
|------------------------------------------------------------------------------------------------------|---------|
| Mass spectrum of <b>L1</b>                                                                           | 3       |
| <sup>1</sup> H NMR spectrum of <b>L1</b>                                                             | 3       |
| Mass spectrum of <b>L2</b>                                                                           | 4       |
| <sup>1</sup> H NMR spectrum of <b>L2</b>                                                             | 4       |
| Excitation and emission spectrum of <b>L1</b>                                                        | 5       |
| Change in the fluorescence spectrum of <b>L2</b> in presence of Cu <sup>2+</sup>                     | 5       |
| Selectivity of <b>L1</b> for Cu <sup>2+</sup> over other ions                                        | 6       |
| Selectivity of <b>L1</b> for Cu <sup>2+</sup> in Cu <sup>2+</sup> /M <sup>n+</sup> coexisting system | 6       |
| Mass spectra of <b>L1</b> .Cu <sup>2+</sup> complex                                                  | 7       |
| Plot of normalized fluorescence intensity vs. wavelength                                             | 7       |
| Selectivity of <b>L1</b> .Cu <sup>2+</sup> for CN <sup>-</sup> over other anions                     | 8       |
| Effect of pH                                                                                         | 8       |

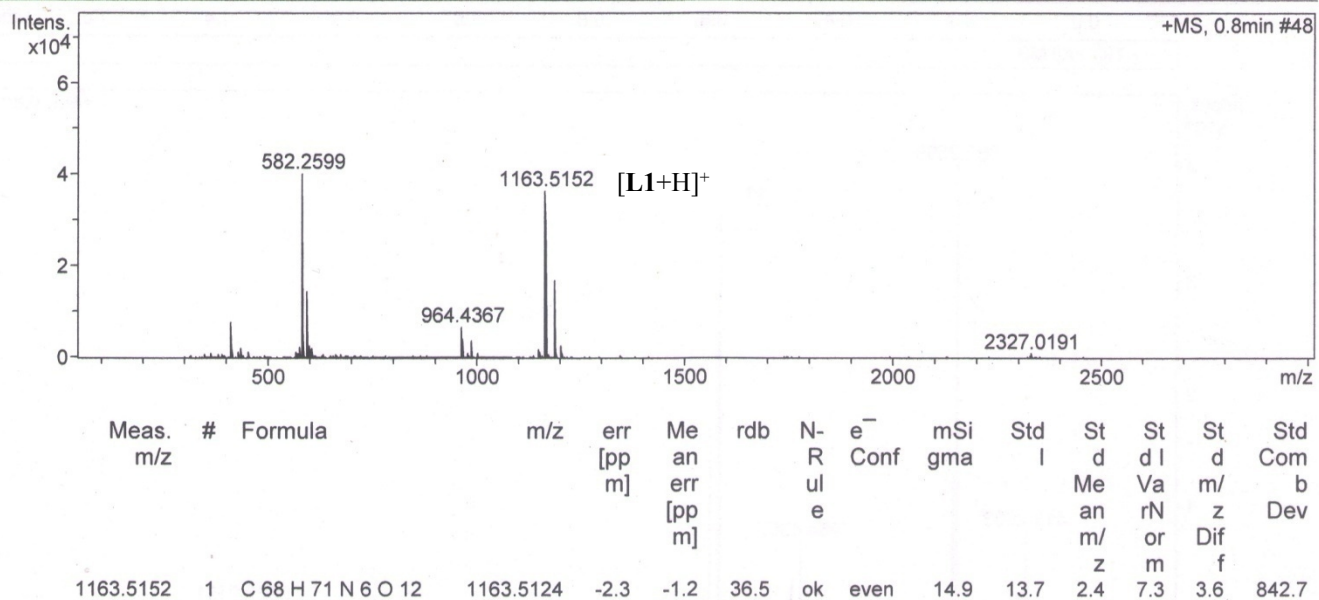

Figure S1: Mass spectrum of L1

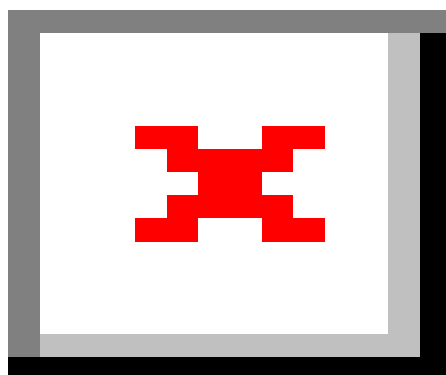

Figure S2: <sup>1</sup>H NMR spectrum of L1

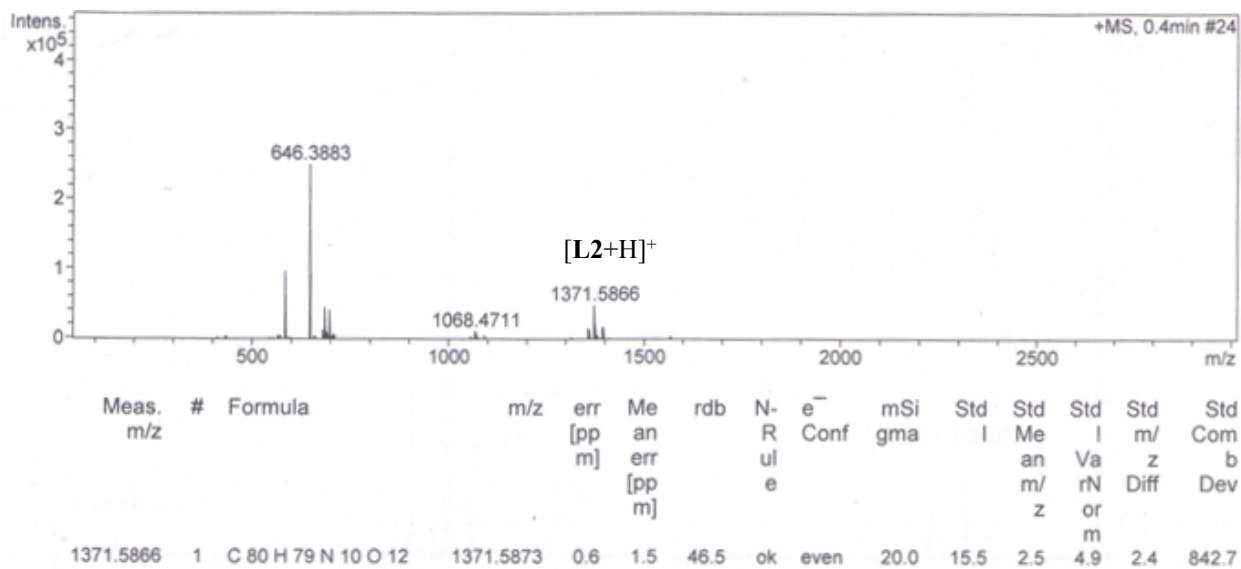

Figure S3: Mass spectrum of L2

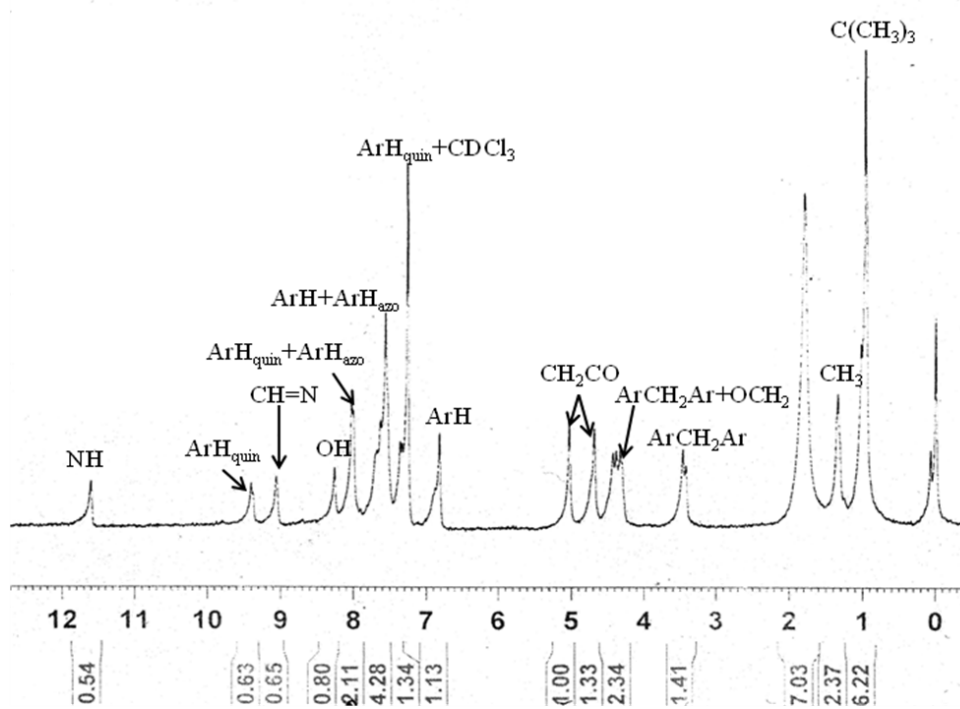

Figure S4: <sup>1</sup>H NMR spectrum of L2

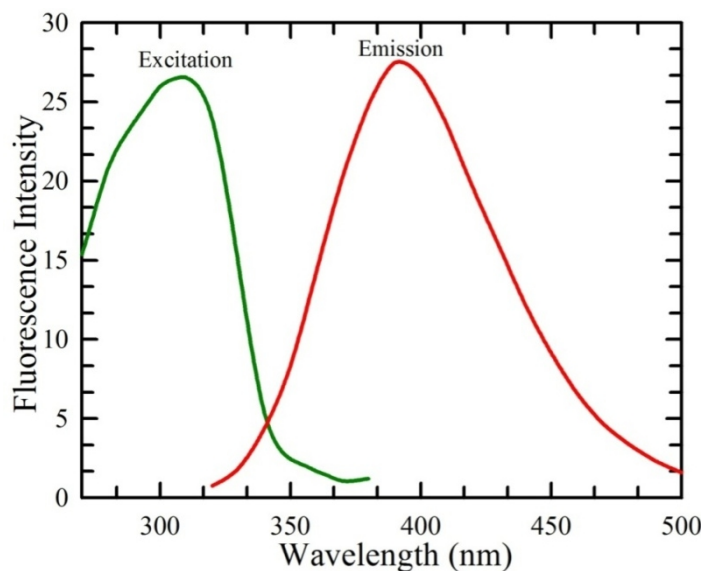

Figure S5: Excitation and emission spectra of **L1** in  $\text{CH}_3\text{CN}$  ( $\lambda_{\text{ex}} = 315 \text{ nm}$ ,  $\lambda_{\text{em}} = 390 \text{ nm}$ )

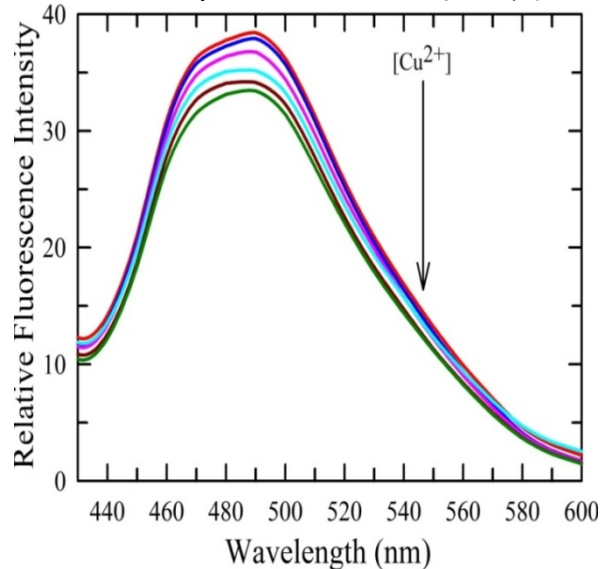

Figure S6: Quenching of fluorescence intensity of **L2** in presence of  $\text{Cu}^{2+}$  (2 equiv.) in  $\text{CH}_3\text{CN}:\text{H}_2\text{O}$  (7:3, v/v) [**L2** =  $20 \mu\text{M}$ ,  $\lambda_{\text{excitation}} = 370 \text{ nm}$ ]

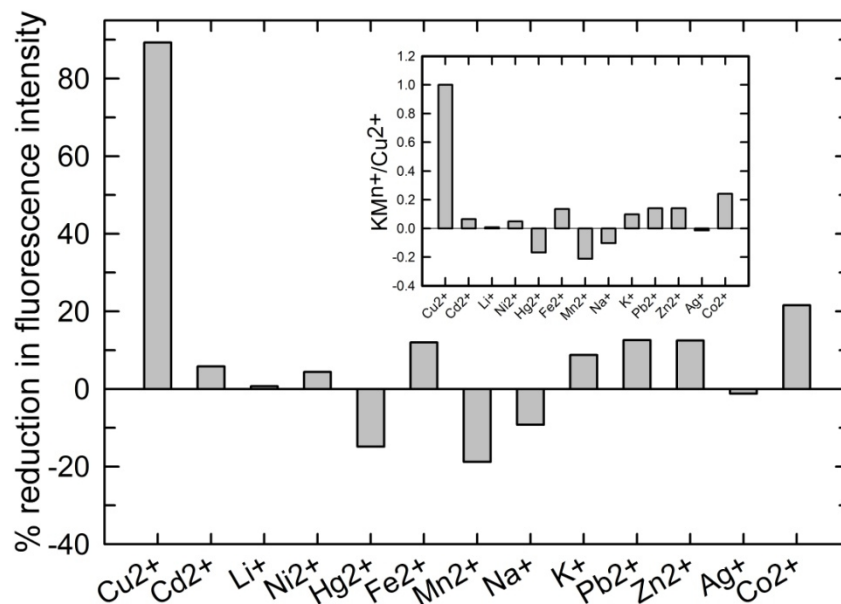

Figure S7: Percentage decrease in the fluorescence intensity of the receptor (**L1**)(20  $\mu$ M) upon addition of various metal ions in  $CH_3CN:H_2O$  (7:3, v/v) ( $\lambda_{excitation}=315$  nm); inset shows Selectivity coefficients,  $K_{M^{n+}/Cu^{2+}} = \Delta F_{M^{n+}} / \Delta F_{Cu^{2+}}$

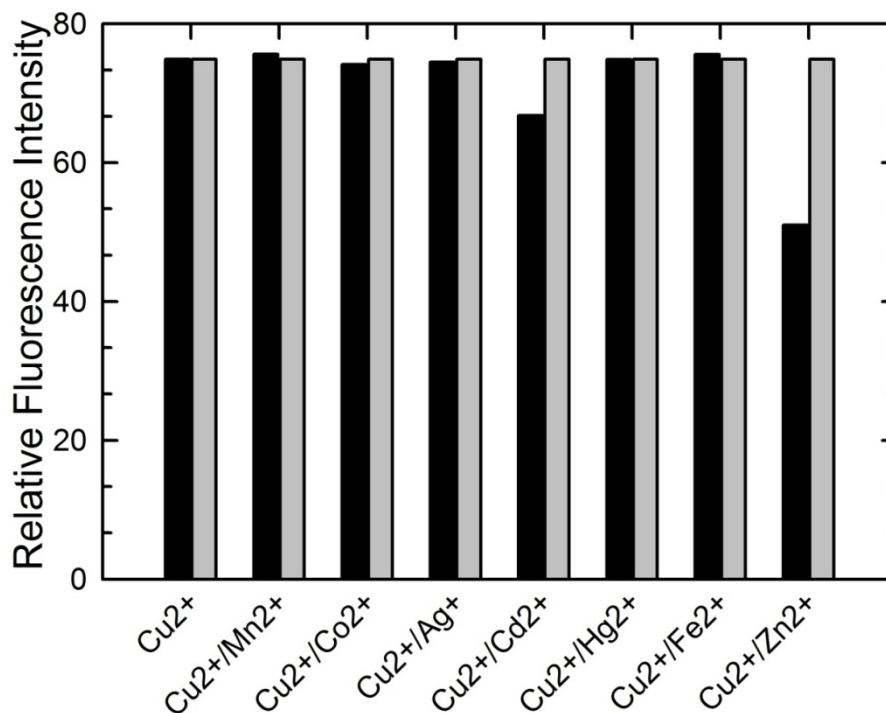

Figure S8: Selectivity of **L1** for  $Cu^{2+}$  over all other metal ions. Grey bar denotes decrease in the intensity by 1mM  $Cu^{2+}$  ion. Black bar denotes change in the fluorescence intensity by  $M^{n+}/Cu^{2+}$  (1mM) coexisting system

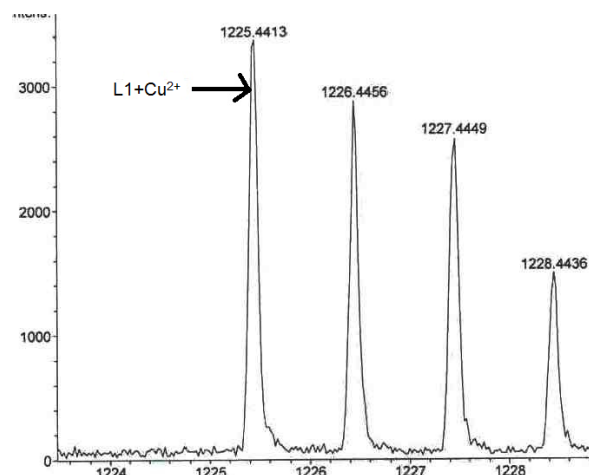

Figure S9: Expanded mass spectrum of **L1**.Cu<sup>2+</sup> complex showing the isotopic pattern

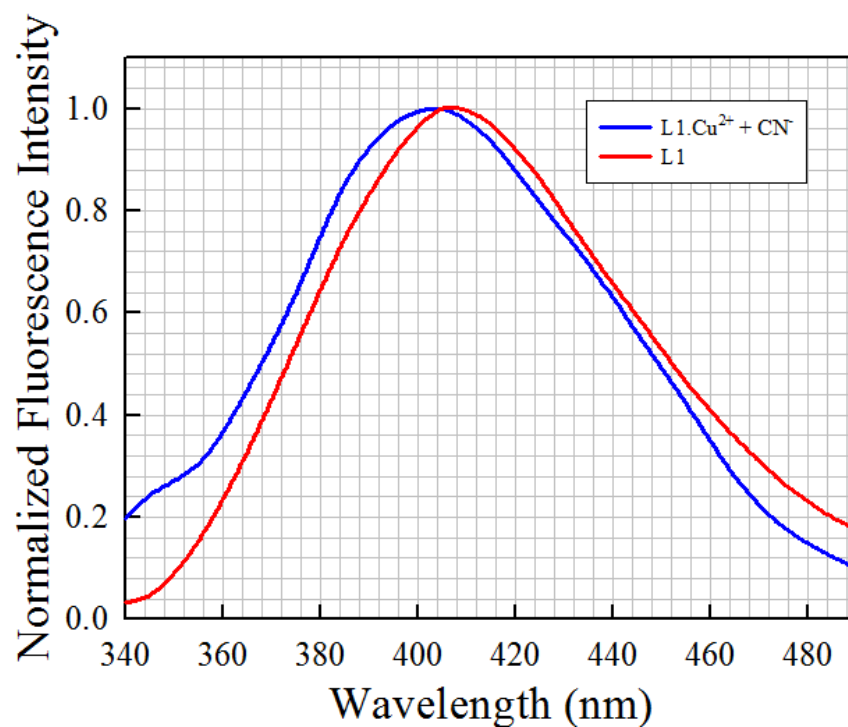

Figure S10: Normalized fluorescence intensity of **L1** alone and **L1**.Cu<sup>2+</sup>+CN<sup>-</sup> vs. wavelength

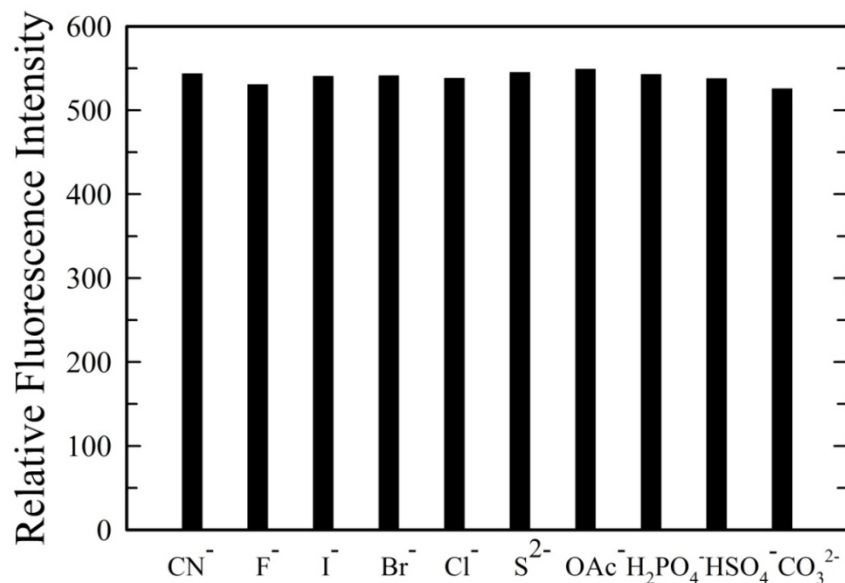

Figure S11: Selectivity of **L1.Cu<sup>2+</sup>** for **CN<sup>-</sup>** over all other anions (10 equiv.)

The effect of pH on the fluorescence spectrum of **L1.Cu<sup>2+</sup>** in the presence and absence of **CN<sup>-</sup>** was studied by measuring the fluorescence intensity at different pH values. It was observed that the interaction of **L1** with copper was most effective between pH 6-8. Consequently interaction of the metallo supramolecular complex with cyanide was examined in this pH range. Lesser reactivity of the **L1** at lower or higher pH could be attributed to protonation of the quinoline nitrogen and lesser availability of copper ions for interaction with **L1** respectively.

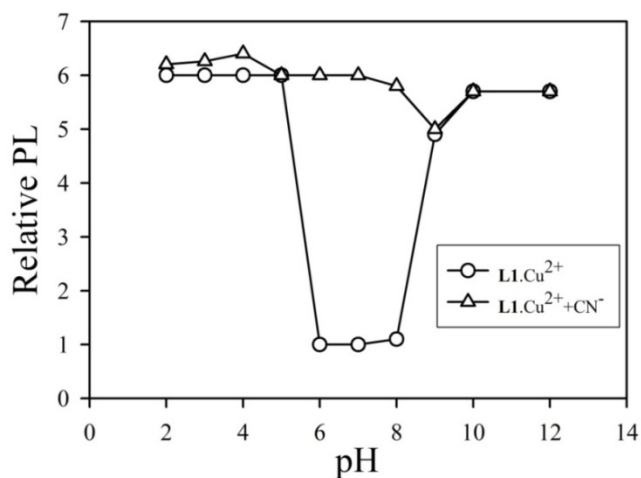

Figure S12: Effect of pH on the emission spectrum of **L1.Cu<sup>2+</sup>** in presence and absence of **CN<sup>-</sup>**
